# Supplementary material for: New Information on Tataouinea hannibalis from the Early Cretaceous of Tunisia and Implications for the Tempo and Mode of Rebbachisaurid Sauropod Evolution
Source: PLOS journal article supplement (doi:10.1371/journal.pone.0123475), 2015-04-29
Supplement: S3 (10.1371/journal.pone.0123475.s003) [file journal.pone.0123475.s003]

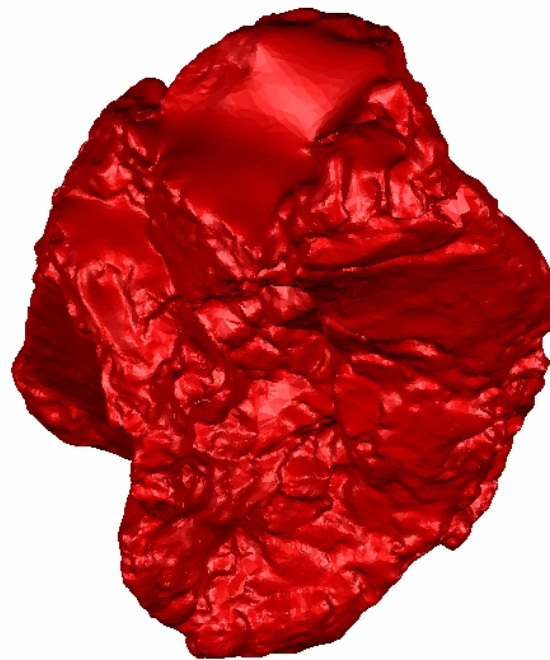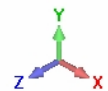

Click on the image to activate the 3D Model.
